# Supplementary material
Source: PubMed Central journal article supplement (PMC4244221)

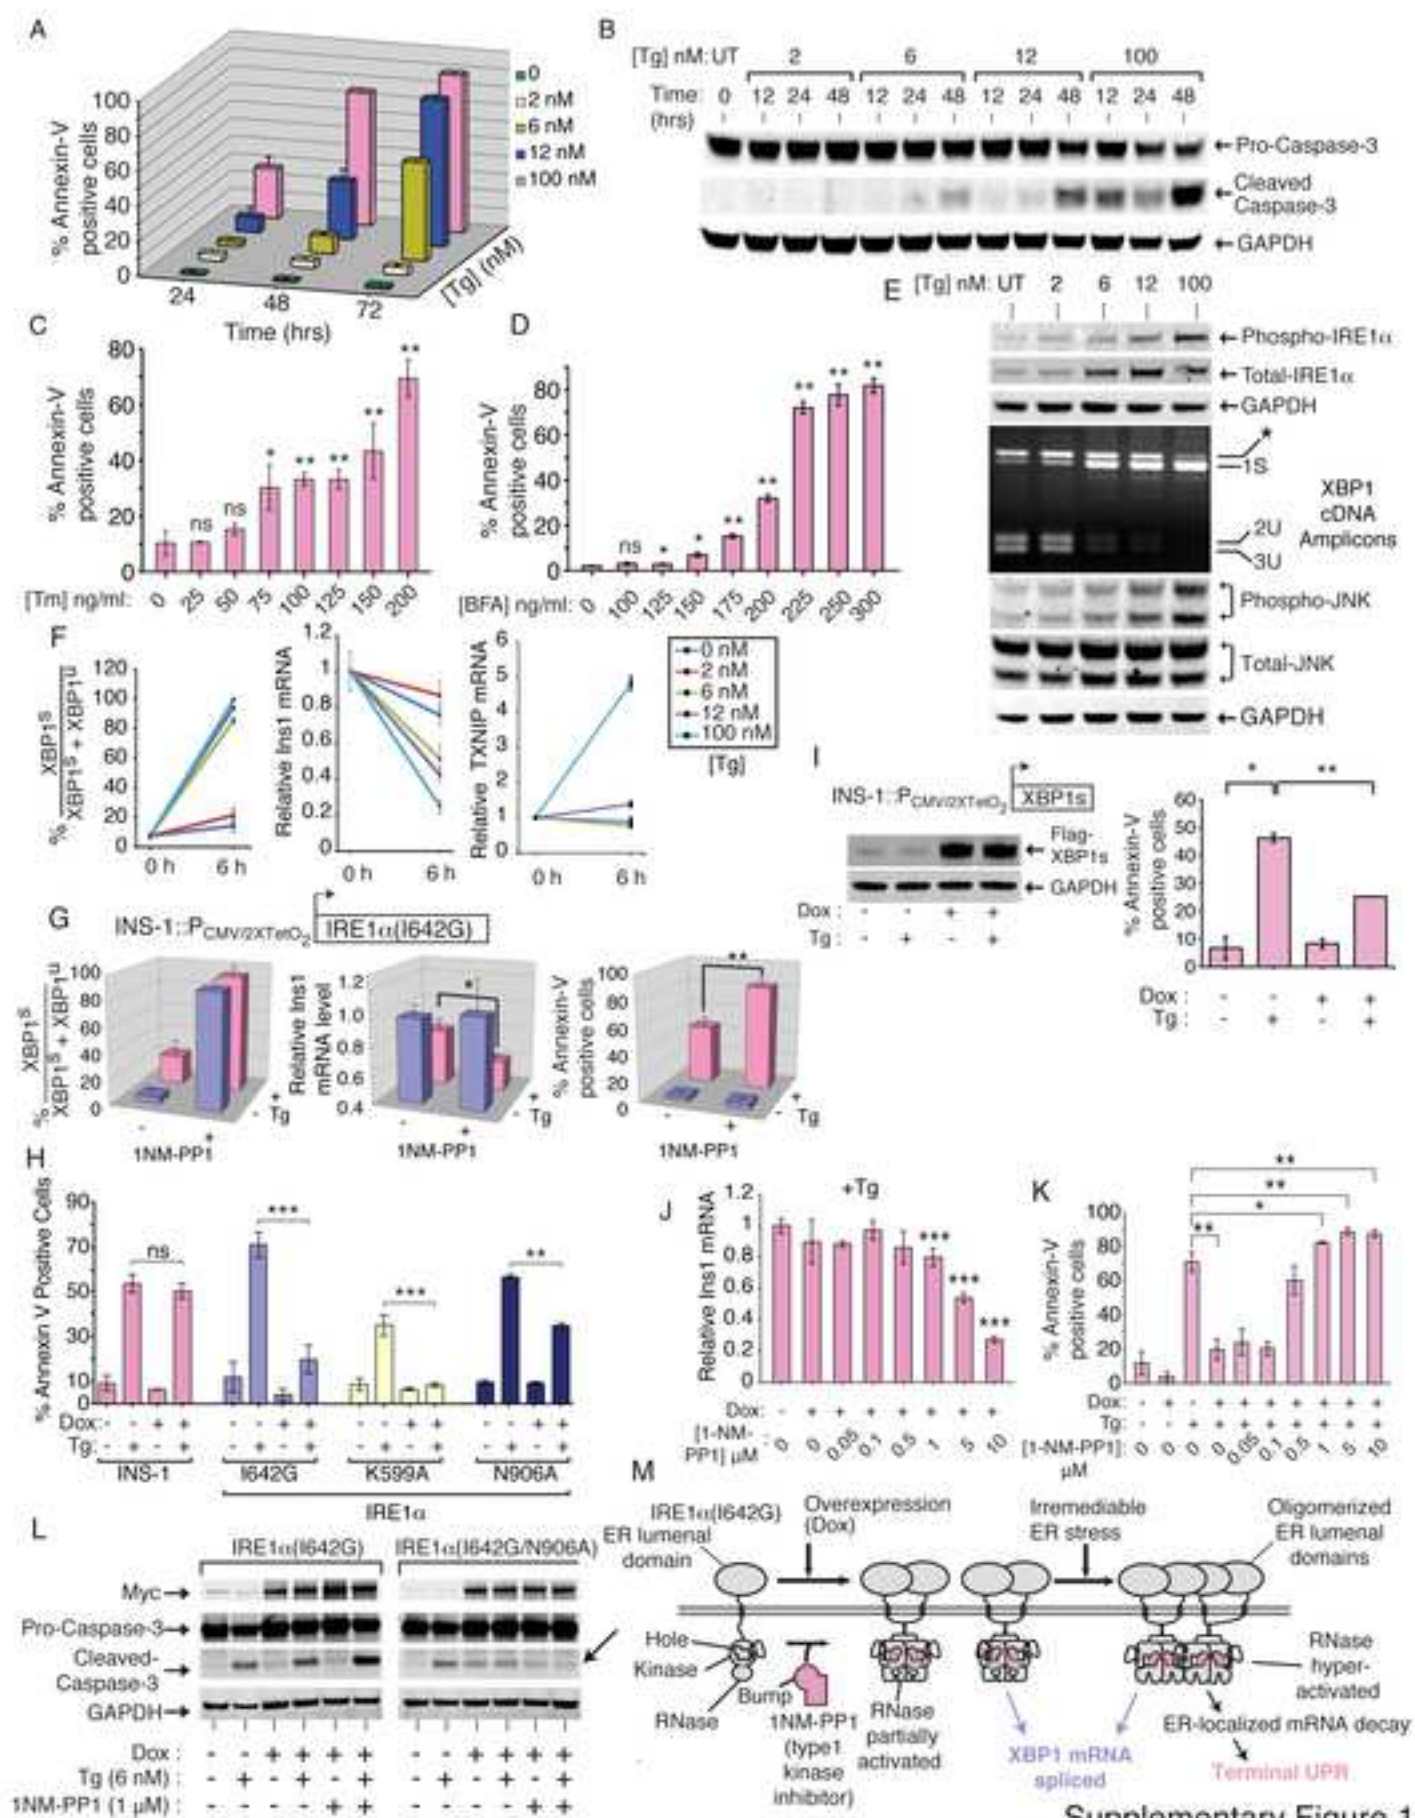

Supplementary Figure 1

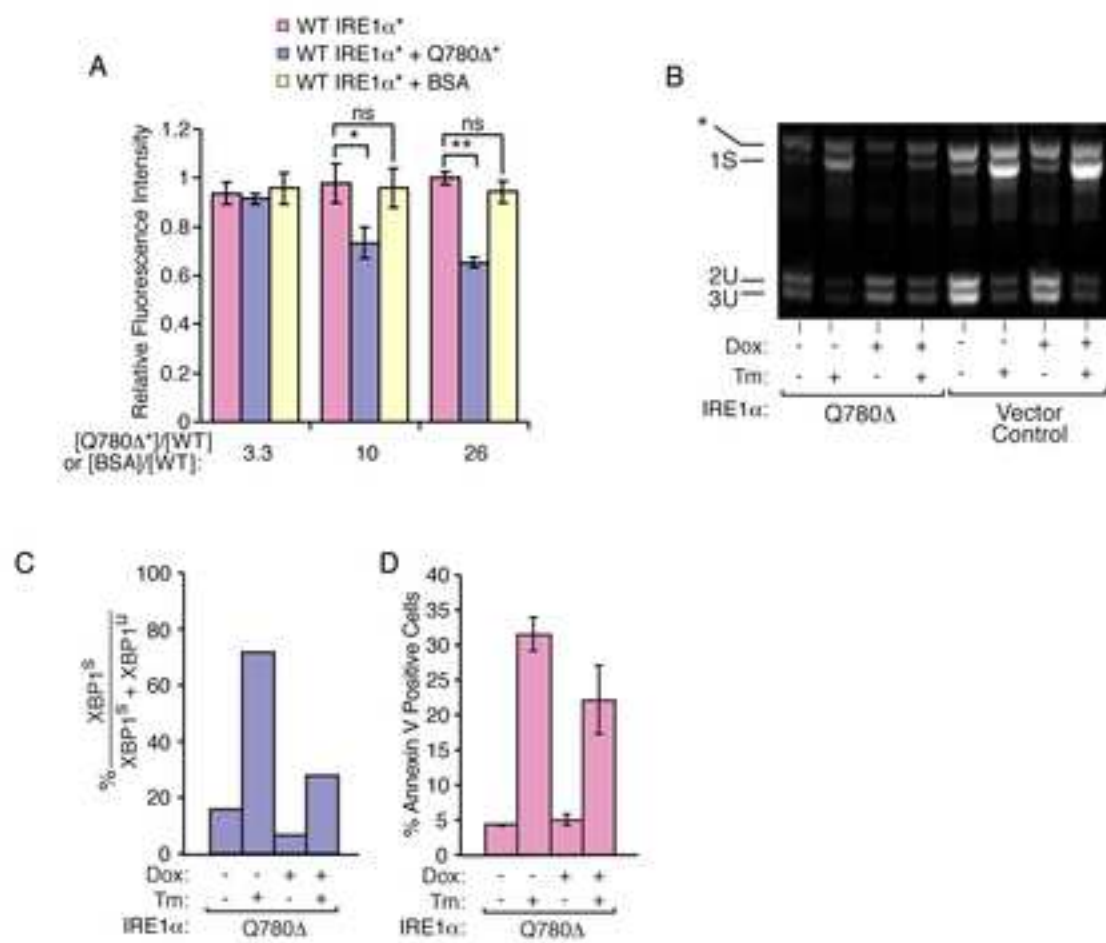

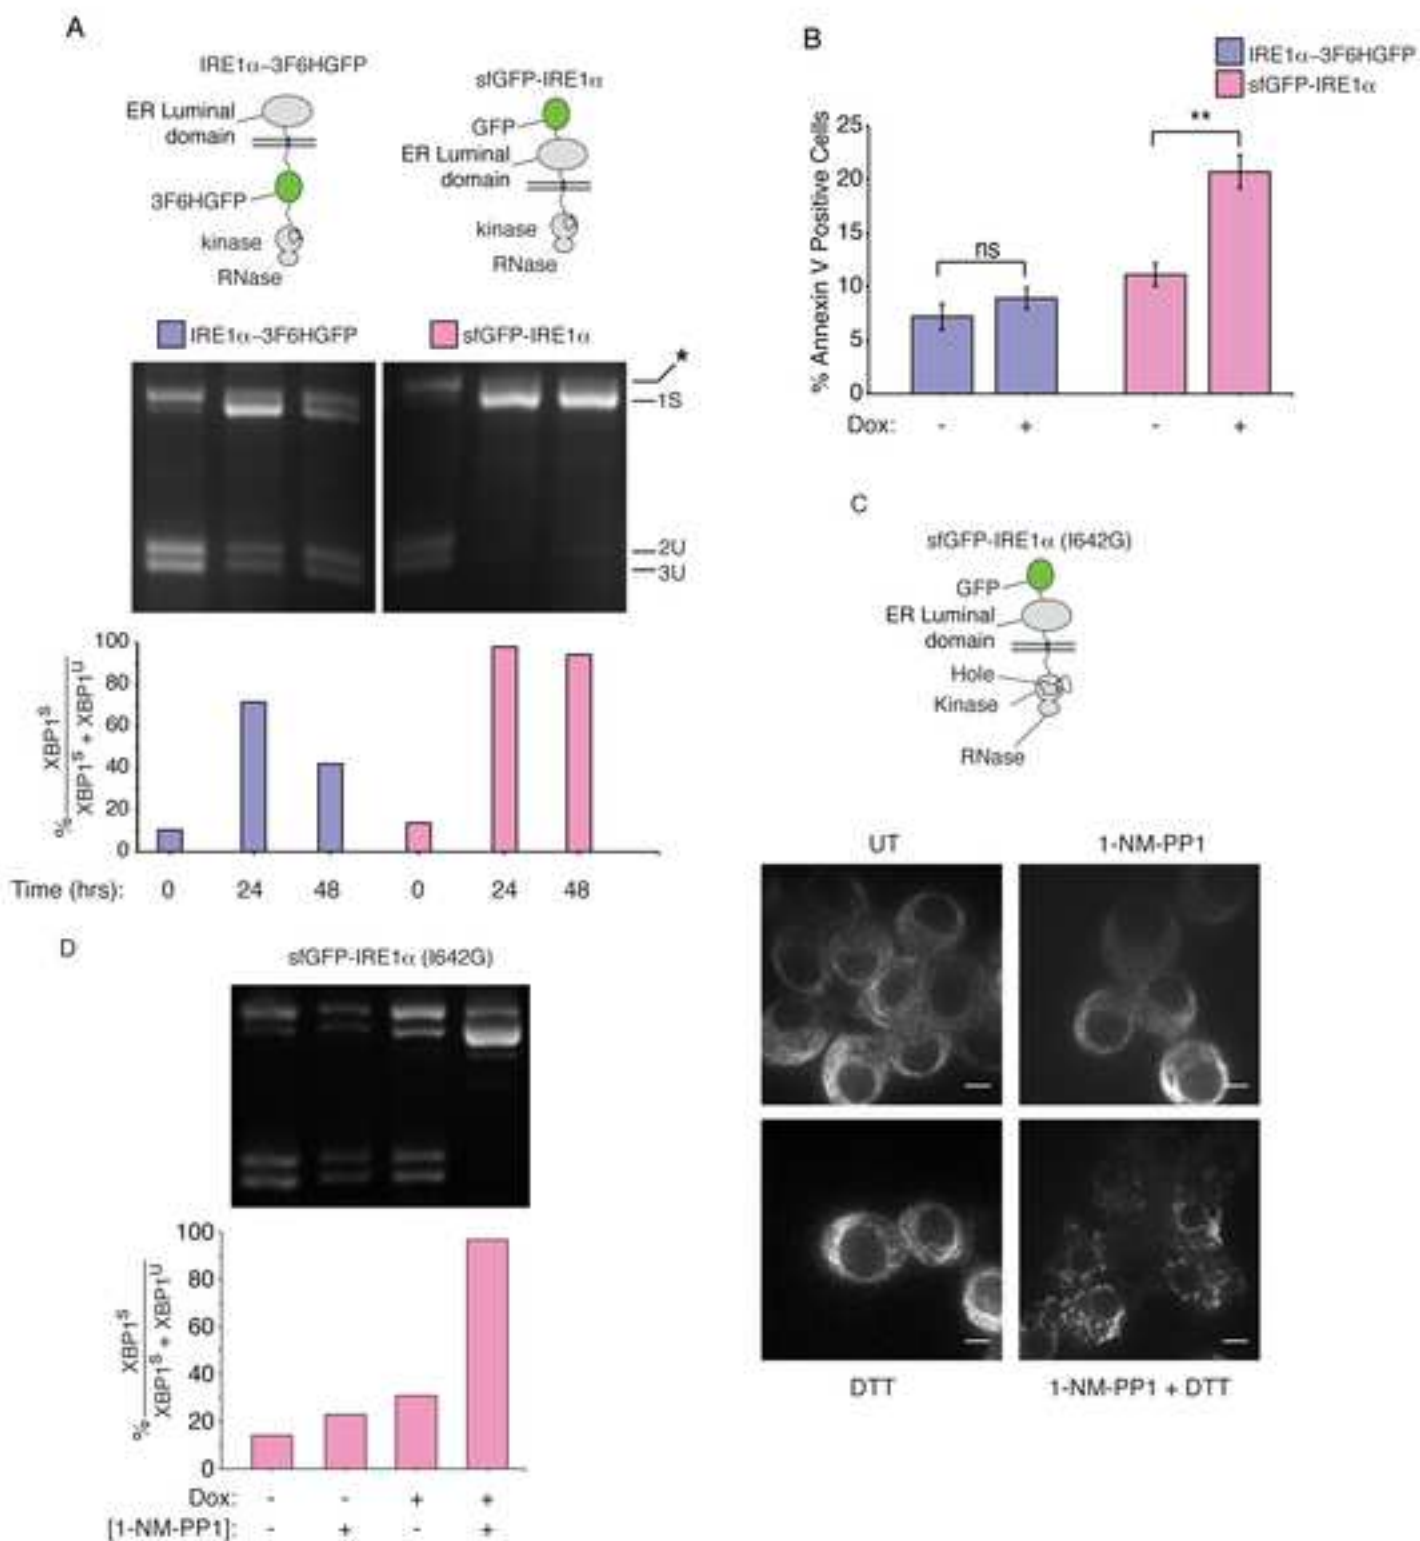

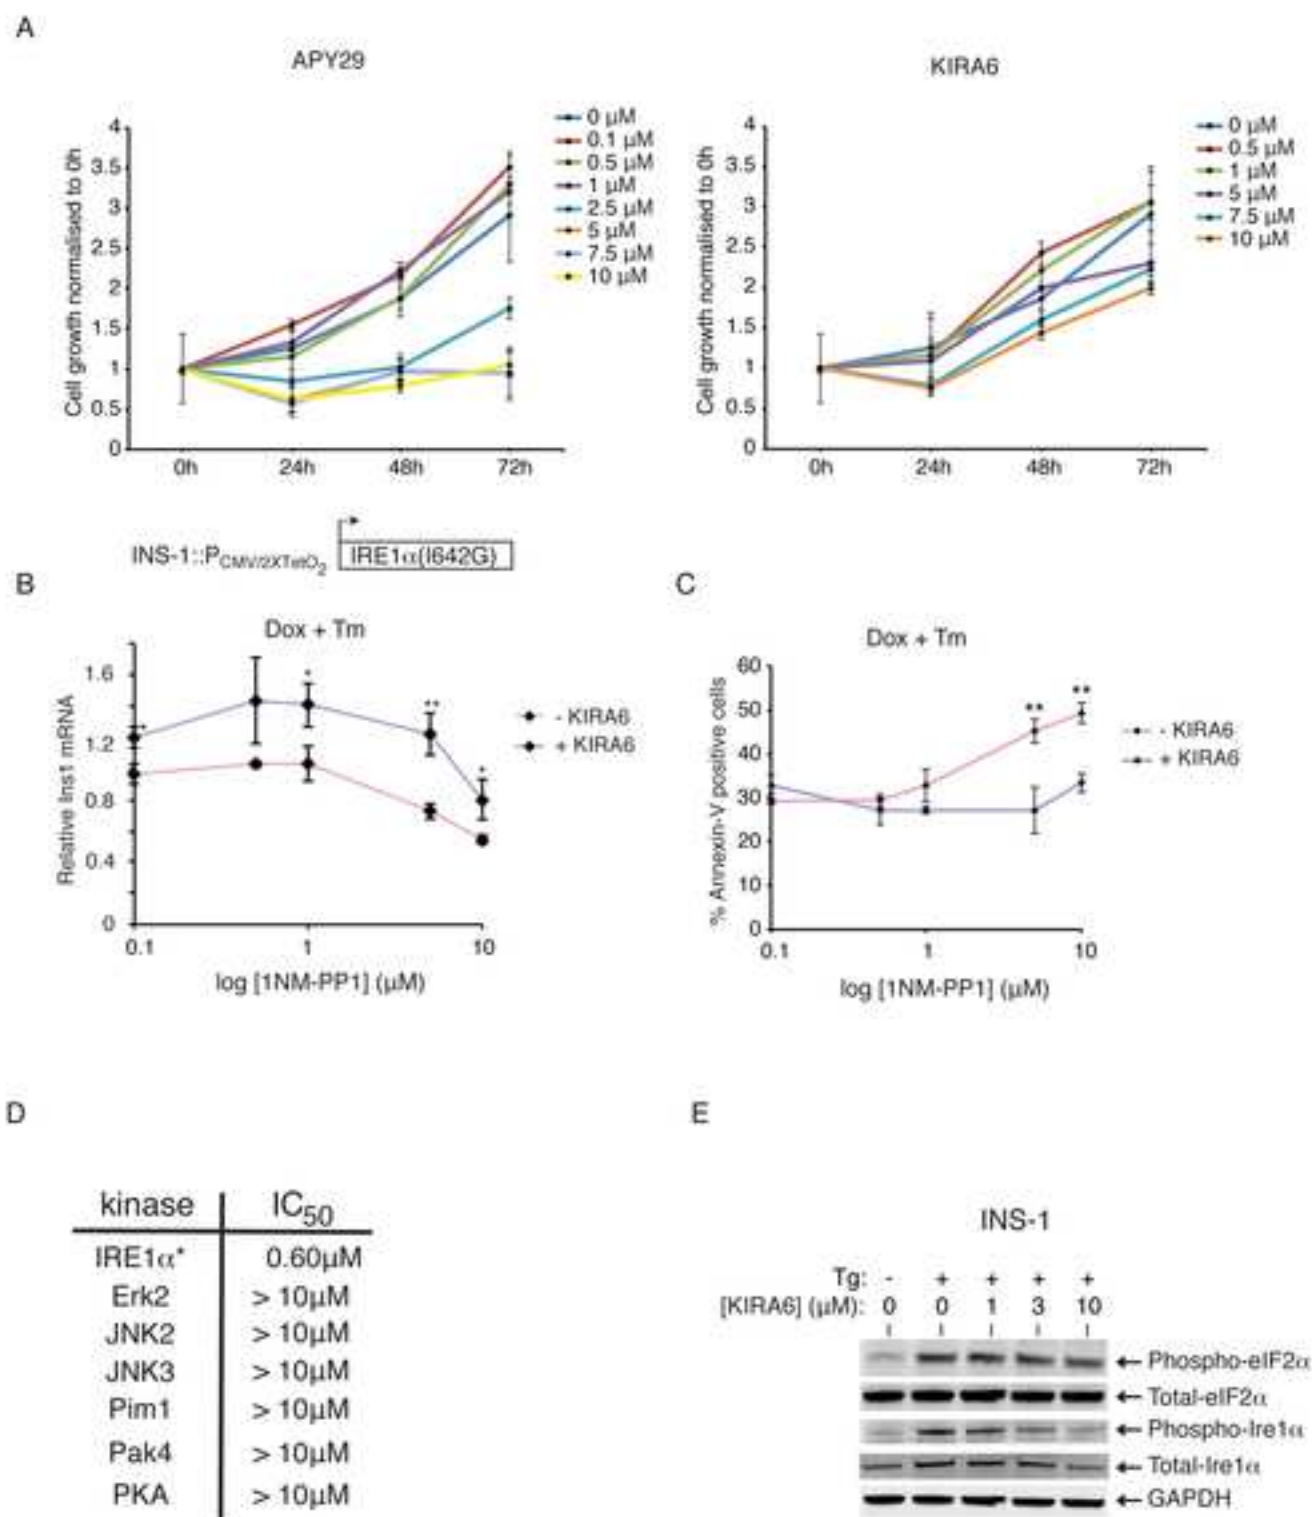

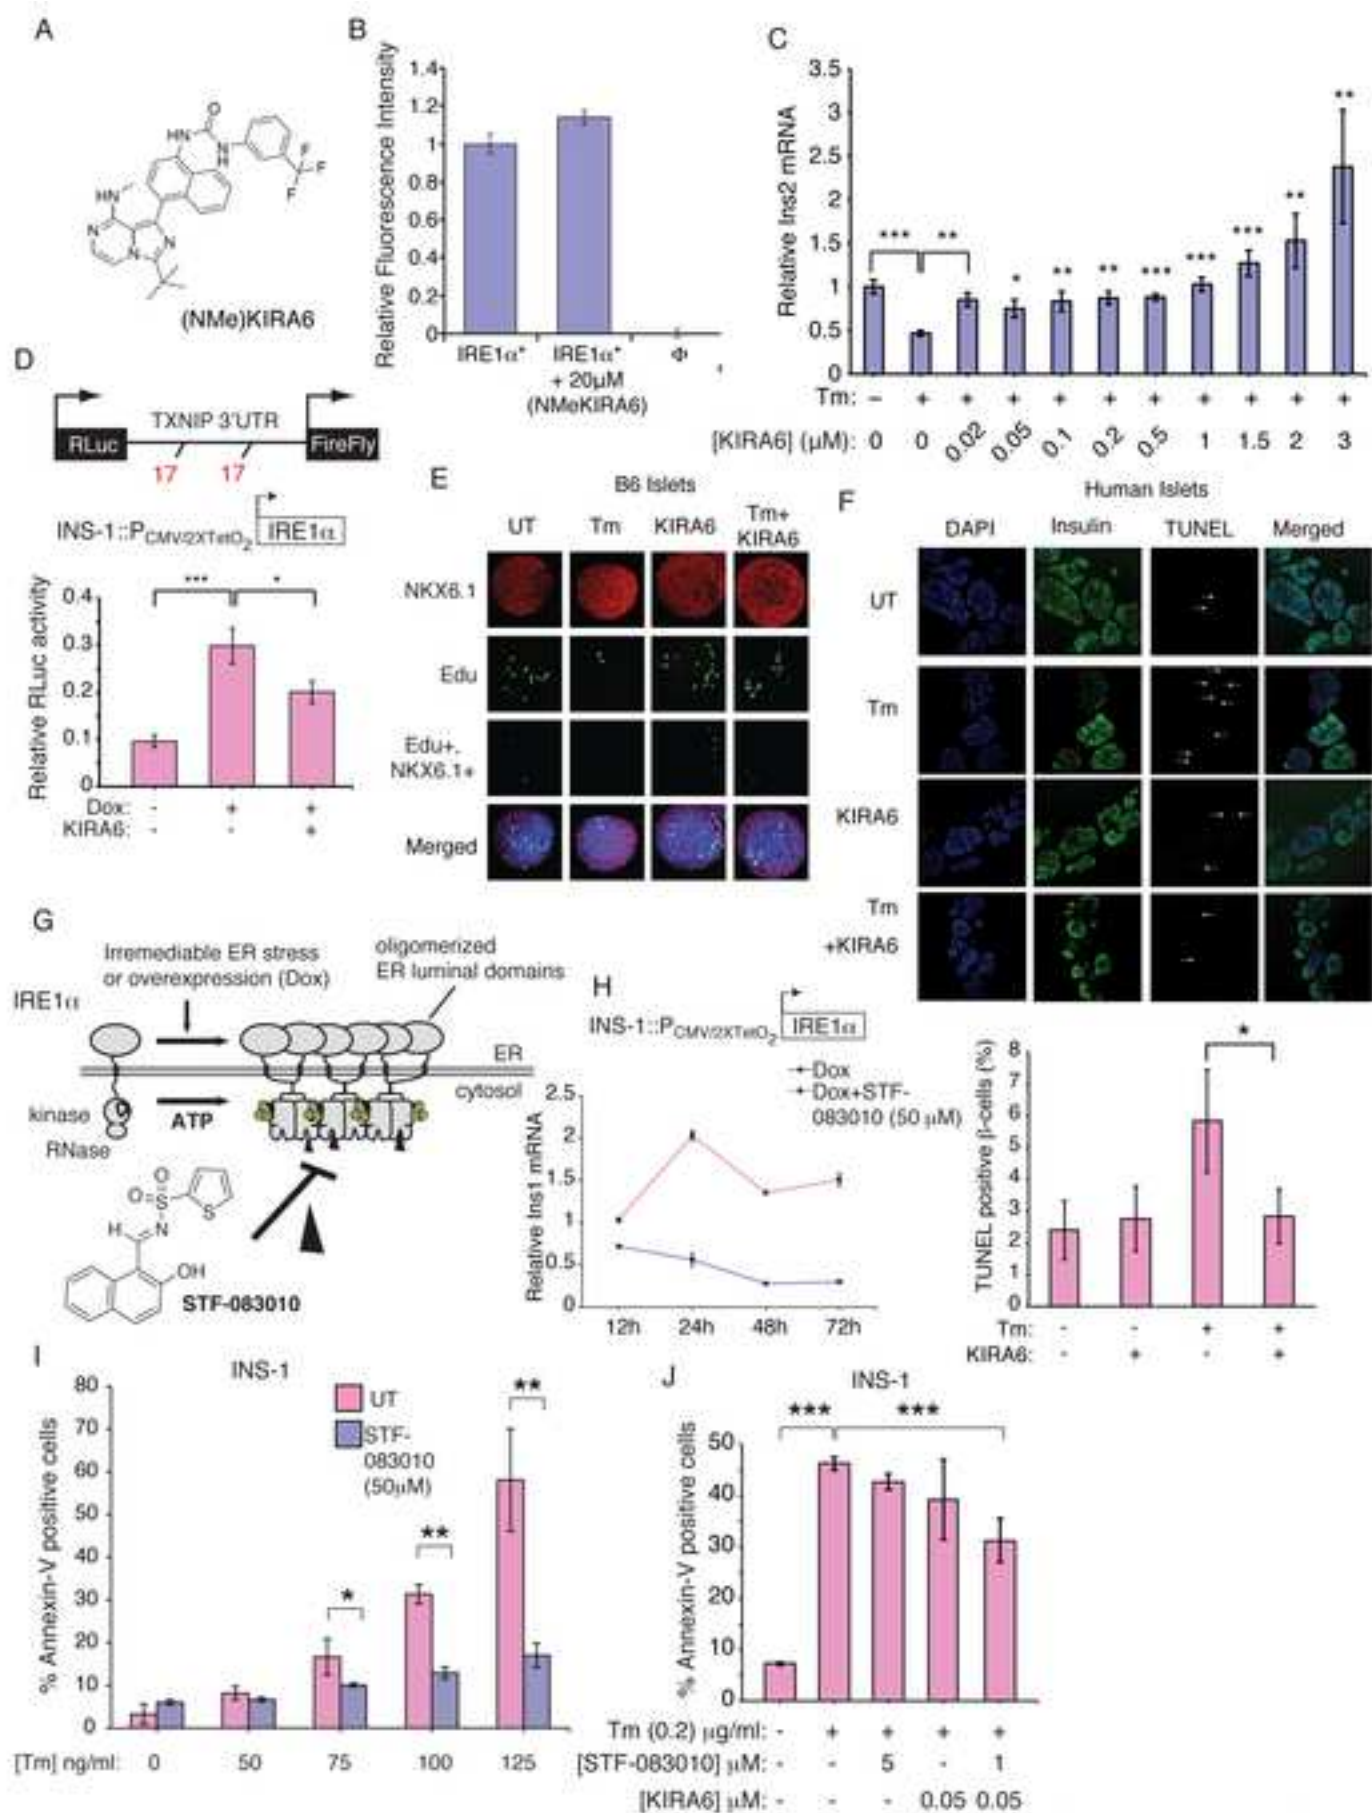

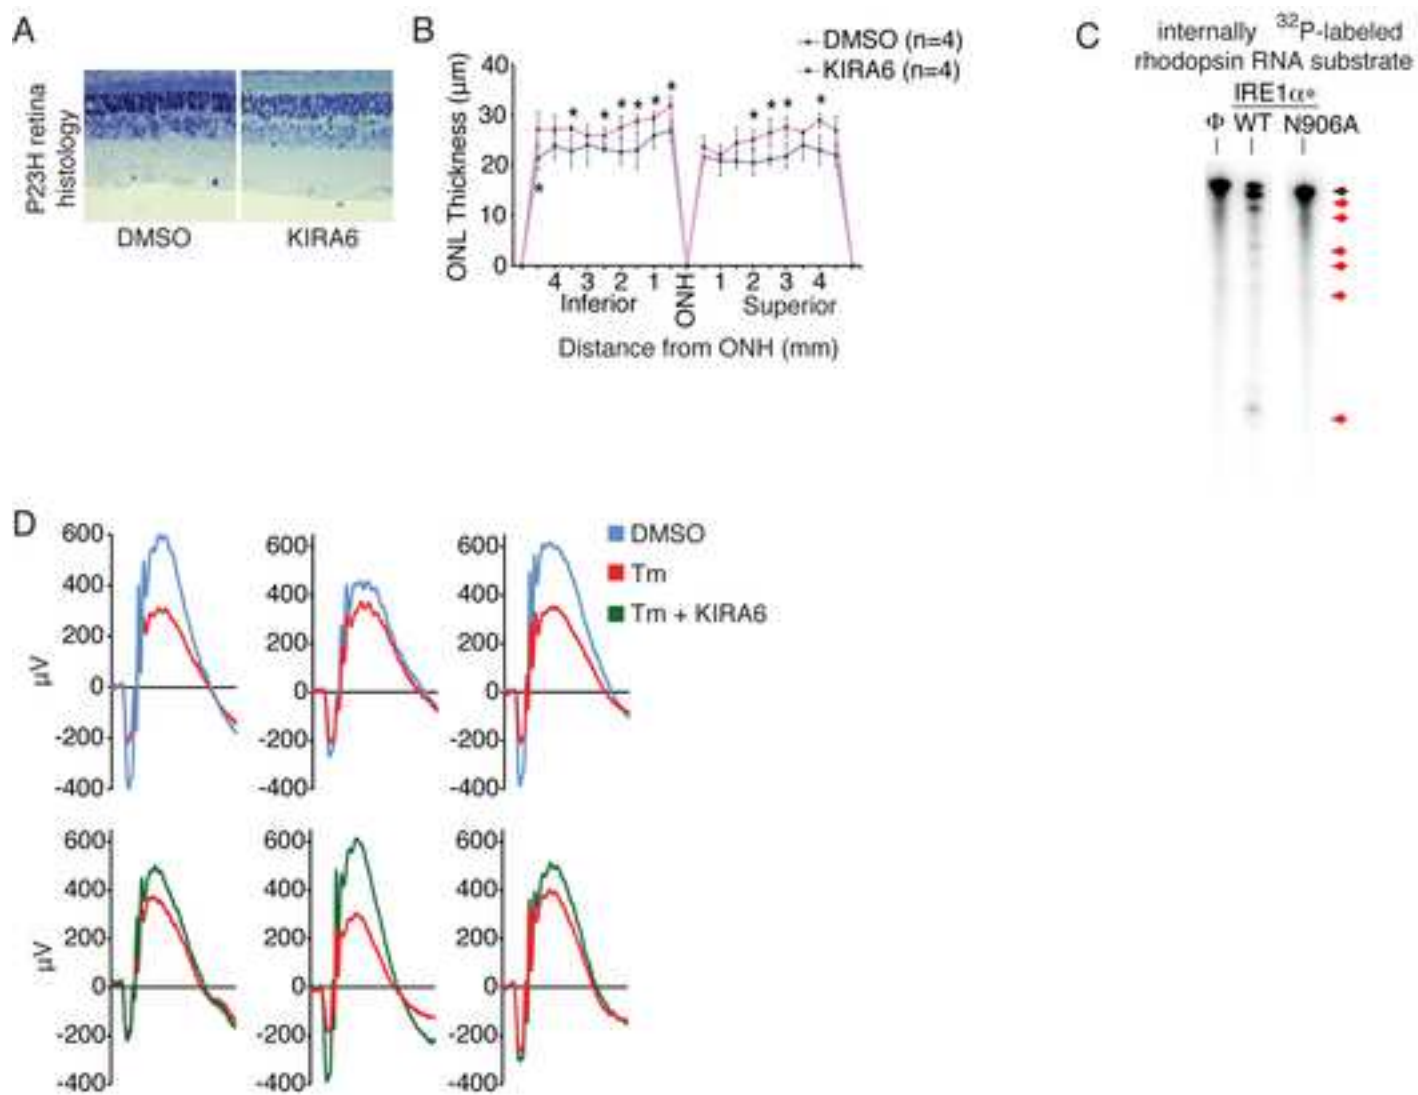

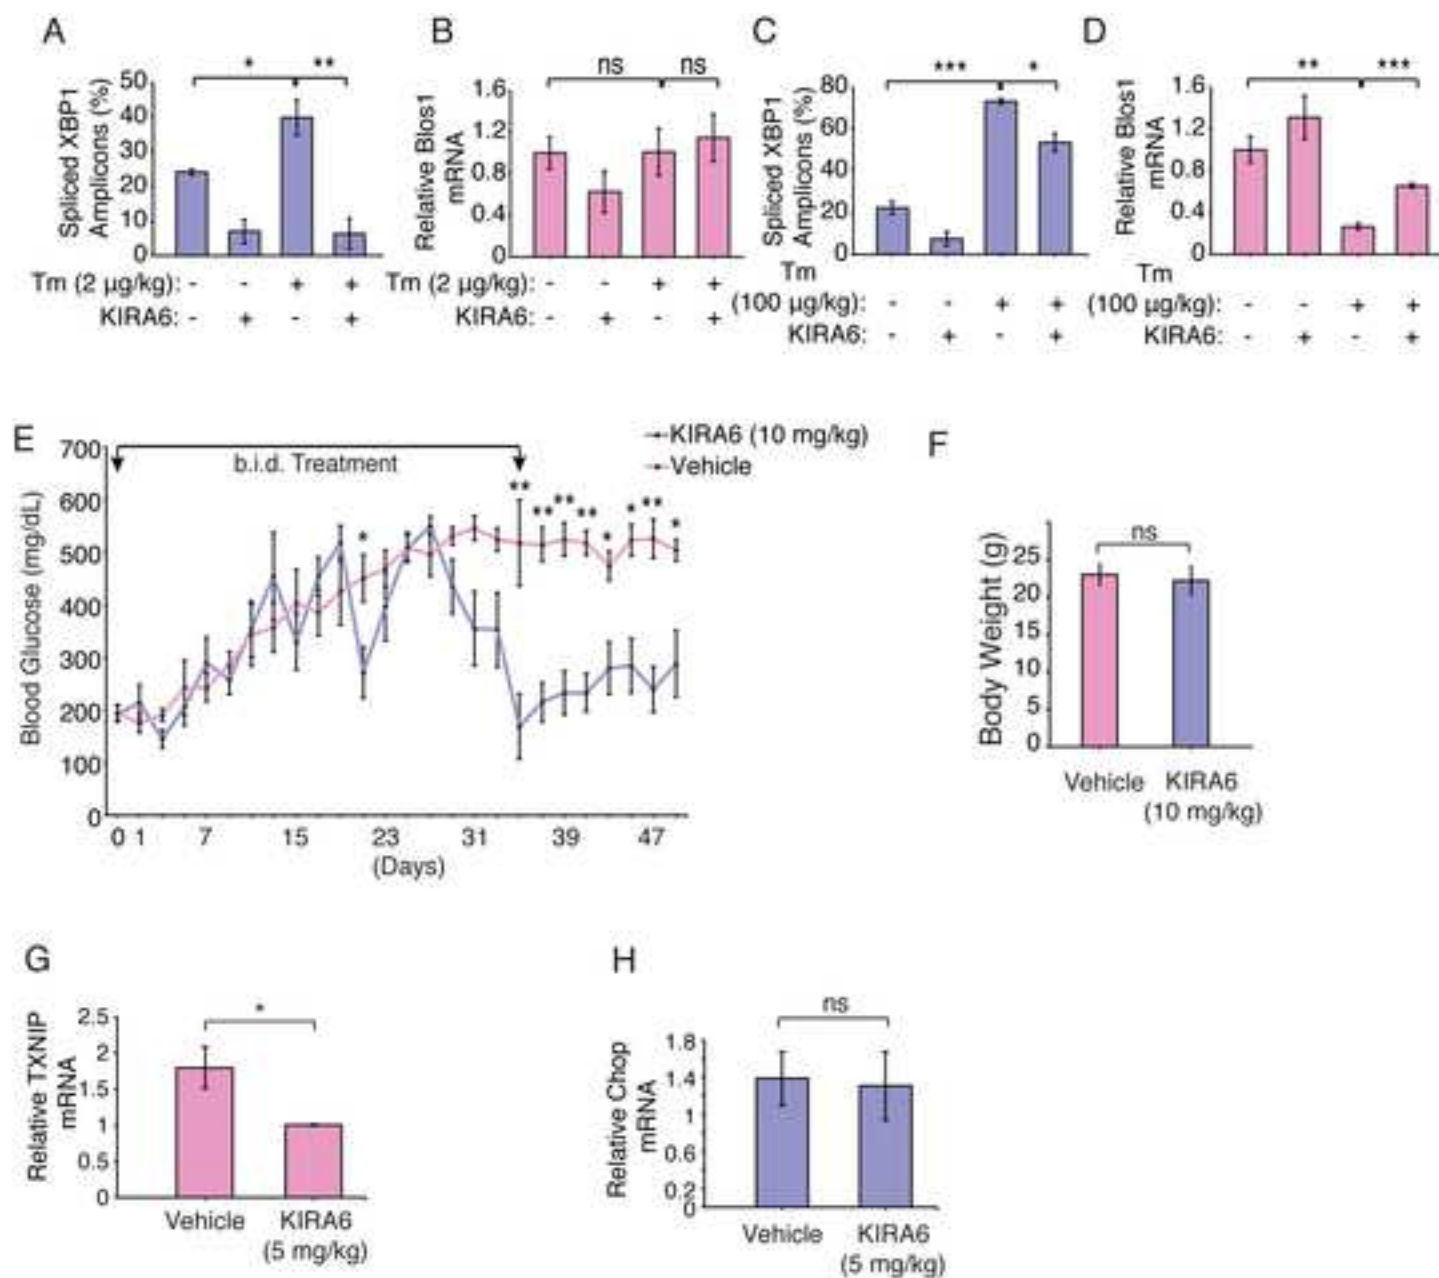

Supplement: NIHMS611880-supplement-09.pdf [file NIHMS611880-supplement-09.pdf]
